# Supplementary material for: Synthesis of Bi2O3–Bi4V2O11 heterojunctions with high interface quality for enhanced visible light photocatalysis in degradation of high-concentration phenol and MO dyes
Source: Royal Society of Chemistry journal article supplement (doi:10.1039/c8ce00101d), 2018-01-01
Supplement: c8ce00101d1.pdf [file c8ce00101d1.pdf]

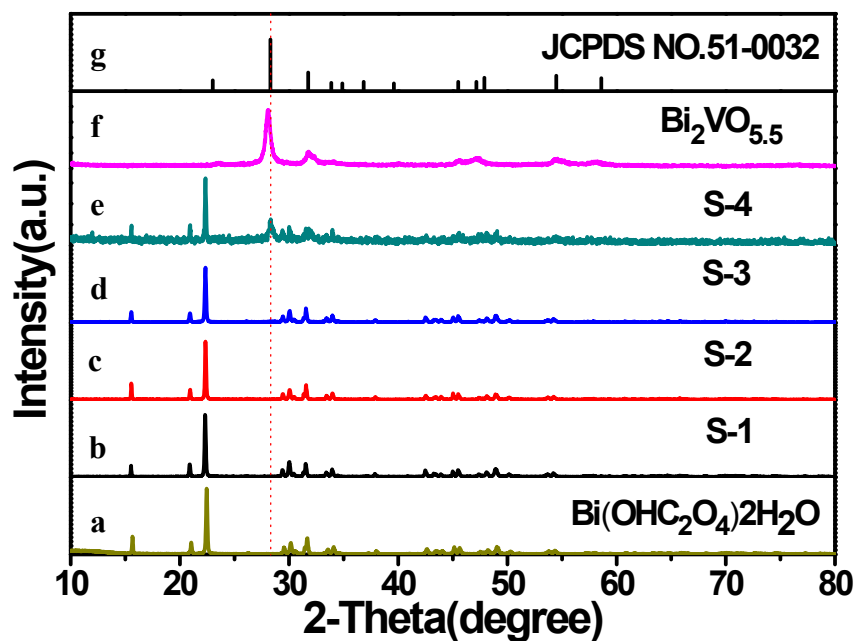

**Figure S1.** The XRD patterns of the precursors, (a)  $\text{Bi}(\text{OHC}_2\text{O}_4)\cdot 2\text{H}_2\text{O}$ , (b) S-1, (c) S-2, (d) S-3 (e) S-4 (f)  $\text{Bi}_2\text{VO}_{5.5}$  and (g) Standard Card of  $\text{Bi}_2\text{VO}_{5.5}$

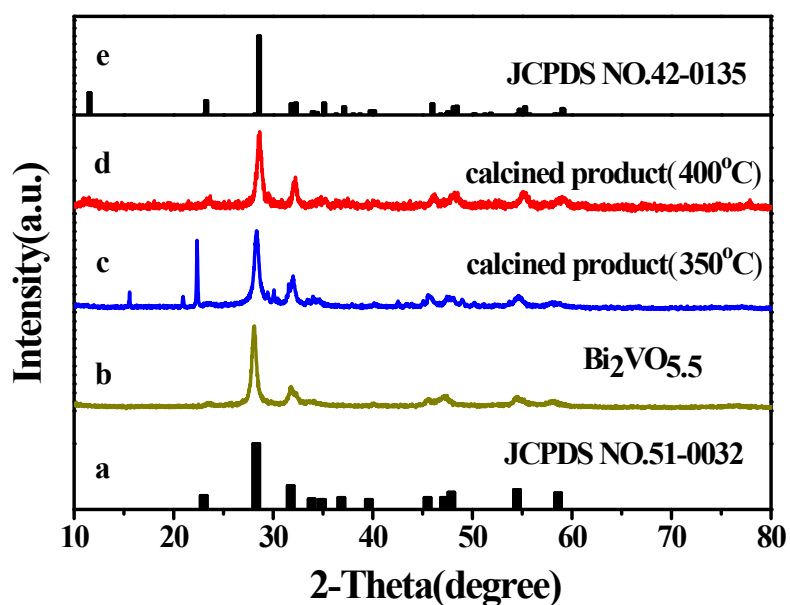

**Figure S2.** The XRD patterns of the pure  $\text{Bi}_2\text{VO}_{5.5}$  (b), the calcined products (c-d) and the Standard Cards of  $\text{Bi}_2\text{VO}_{5.5}$  (a) and  $\text{Bi}_4\text{VO}_{11}$  (e).

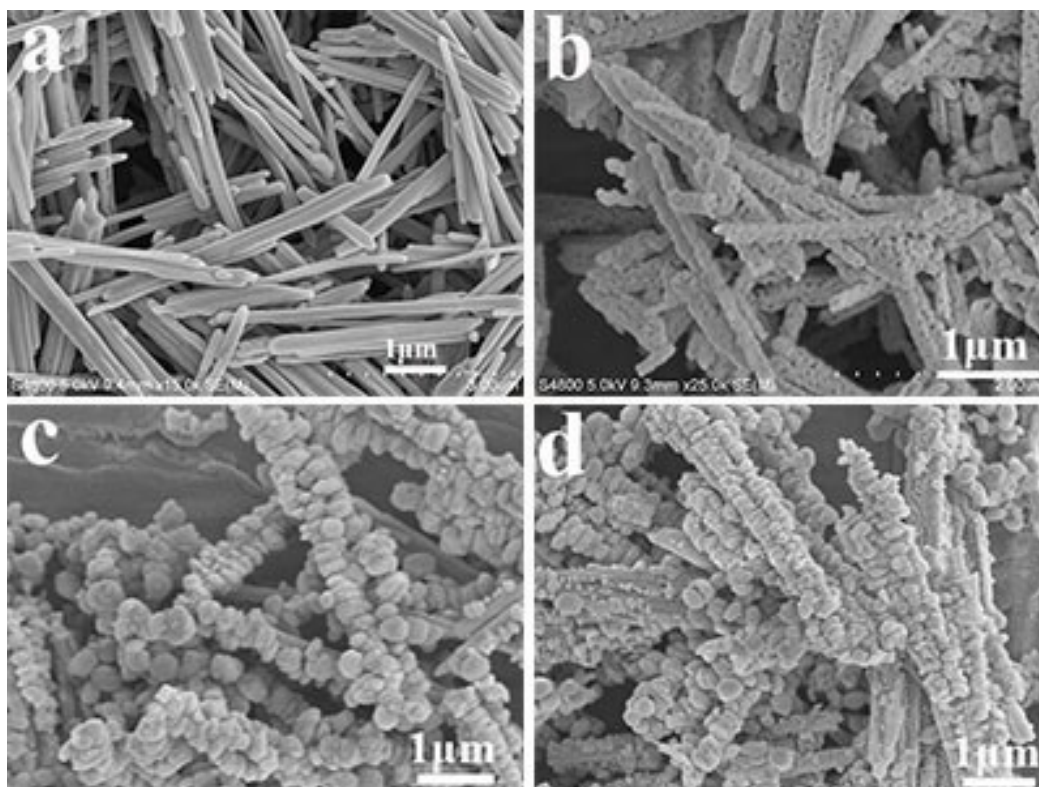

**Figure S3** FE-SEM images of the  $\text{Bi}(\text{OHC}_2\text{O}_4)\cdot 2\text{H}_2\text{O}$  (a) and the relative calcined products (b); the precursors with high loaded- $\text{Bi}_2\text{VO}_{5.5}$  content (c) and and the relative calcined product (d).

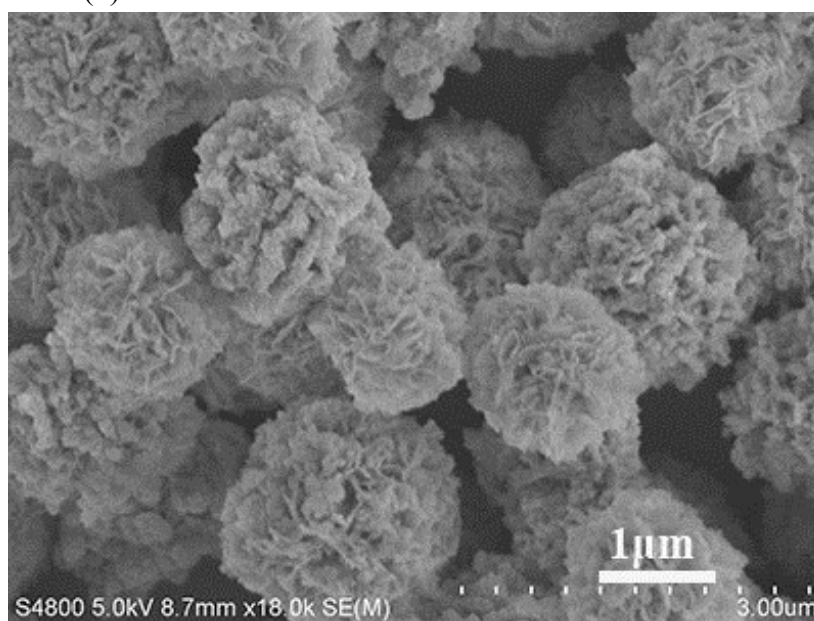

**Figure S4** FE-SEM images of the pure  $\text{Bi}_2\text{VO}_{5.5}$ .

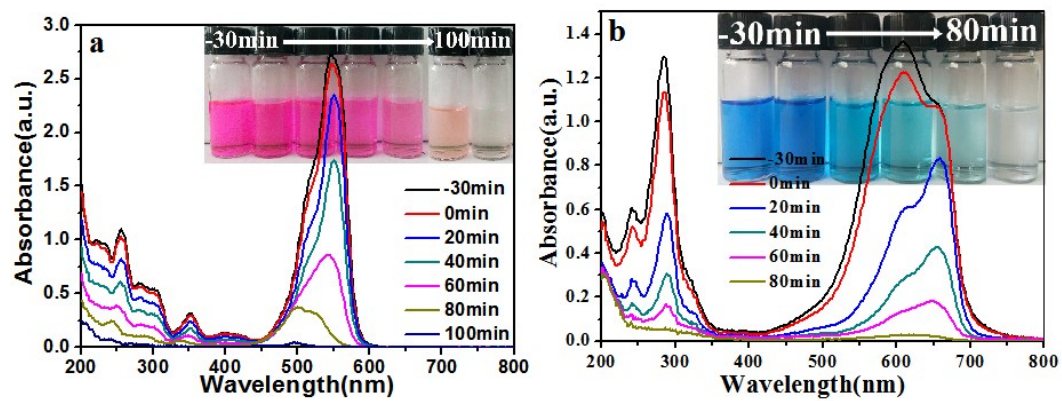

**Figure S5** UV-vis absorption spectra of (a) RhB (20 mg/L) and (b) MB (10mg/L) using DS-2 as photocatalyst under visible light irradiation.

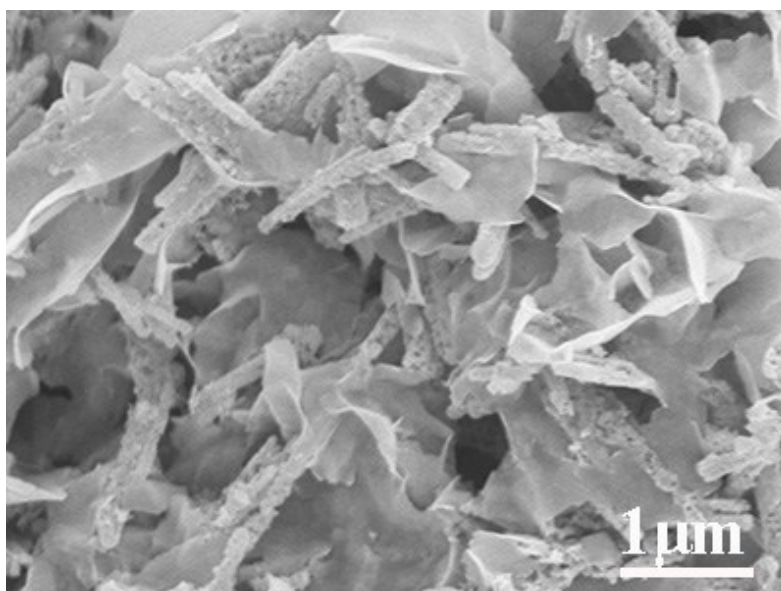

**Figure S6** FE-SEM images of the DS-2 sample after the recycling photocatalysis.
